# Supplementary material for: Histopathological findings and canine pancreatic lipase immunoreactivity in normal dogs and dogs with inflammatory and neoplastic diseases of the pancreas
Source: PubMed Central journal article supplement — J Vet Intern Med. 2020 May 7;34(3):1127–34. doi: 10.1111/jvim.15779 (PMC7255677; doi:10.1111/jvim.15779), 2020-05-07
Supplement: JVIM-34-1127-s001.pdf [file JVIM-34-1127-s001.pdf]

**Supplementary Table 1:** Signalment, clinical findings, cPLI values in dogs with histopathologically diagnosed normal or minimally changed pancreas (group 1, n=40)

| No. | Breed               | Age | Sex | Clinical history                     | Tentative clinical diagnosis | Final diagnosis             | cPLI (µg/L) | Sample size (cm)           | Histological diagnosis pancreas |
|-----|---------------------|-----|-----|--------------------------------------|------------------------------|-----------------------------|-------------|----------------------------|---------------------------------|
| 1   | Cairn Terrier       | 1   | FN  | diarrhoea                            | GI disease                   | enteritis                   | 5.0         | 0.3x0.3x0.3                | normal                          |
| 2   | Australian Shepherd | 1   | M   | convulsions, nystagmus               | intoxication                 | epilepsy after intoxication | 5.4         | Complete pancreas p.m.     | normal                          |
| 3   | Beagle              | 11  | M   | severe jaundice                      | liver tumour                 | mucocele of gall bladder    | 5.5         | 1.0x1.0x1.0                | + nod. hyp.                     |
| 4   | Griffon             | 9   | M   | vomiting, painful abdomen            | GI disease                   | hepatitis and peritonitis   | 8.4         | 0.5x0.5x0.5                | + nod. hyp.                     |
| 5   | Boerboel            | 1   | M   | jaundice                             | shunt                        | intestinal lymphoma         | 8.6         | 0.8x0.2x0.2                | ++ bleeding                     |
| 6   | Mix                 | 9   | M   | vomiting, weight loss                | GI disease                   | intestinal carcinoma        | 9.1         | 0.3x0.3x0.3                | normal                          |
| 7   | Labrador            | 1   | F   | diarrhoea                            | GI disease                   | enteritis                   | 10.9        | 0.5x0.5x0.5                | normal                          |
| 8   | JRT                 | 10  | M   | painful abdomen                      | GI disease, pancreatitis     | enteritis                   | 11.1        | 1.0x0.4x0.2                | normal                          |
| 9   | Labrador            | 3   | M   | diarrhoea, vomiting, painful abdomen | intestinal rupture           | liver degeneration          | 12.0        | 2.0x1.0x0.5<br>2.0x1.0x1.0 | ++ nod. hyp.                    |
| 10  | Poodle              | 7   | M   | vomiting, diarrhoea                  | GI disease                   | enteritis                   | 12.8        | 0.7x0.6x0.3                | + nod. hyp.                     |
| 11  | Fox Terrier         | 10  | FN  | inappetence, Cushing's               | tumour with                  | liver degeneration          | 14.8        | 0.8x0.7x0.3                | normal                          |

|    |                      |    |    |                                         |                            |                        |      |                            |             |
|----|----------------------|----|----|-----------------------------------------|----------------------------|------------------------|------|----------------------------|-------------|
|    |                      |    |    |                                         | liver metastases           |                        |      |                            |             |
| 12 | Collie Mix           | 6  | FN | vomiting, diarrhoea                     | GI disease                 | enteritis              | 15.3 | 1.0x0.5x0.2<br>0.2x0.2x0.2 | normal      |
| 13 | Labrador             | 12 | F  | vomiting, painful abdomen               | GI disease                 | copper storage disease | 21.2 | 0.6x0.5x0.2                | normal      |
| 14 | Hovawart             | 9  | MN | vomiting, diarrhoea                     | stomach cancer             | gastric carcinoma      | 22.0 | 1.0x0.5x0.3                | normal      |
| 15 | Basset               | 4  | M  | vomiting, diarrhoea                     | GI disease                 | enteritis              | 22.5 | 1.0x0.6x0.3                | normal      |
| 16 | American<br>Bulldog  | 3  | M  | diarrhoea, weight loss                  | GI disease                 | enteritis              | 32.1 | 0.8x0.3x0.1                | normal      |
| 17 | Shih Tzu             | 11 | M  | elevated liver enzymes                  | liver tumour               | liver degeneration     | 35.4 | 0.5x0.5x0.5                | normal      |
| 18 | Labrador             | 6  | FN | vomiting, anaemia                       | gastric ulcer              | gastric ulcer          | 35.6 | 0.5x0.3x0.2                | normal      |
| 19 | JRT                  | 12 | FN | vomiting, diarrhoea,<br>painful abdomen | GI disease                 | enteritis              | 38.9 | 1.5x0.5x0.2                | + nod. hyp. |
| 20 | French<br>Bulldog    | 4  | MN | enlarged abdomen                        | peritonitis,<br>GI disease | peritonitis            | 42.6 | Complete<br>pancreas p.m.  | normal      |
| 21 | Labrador             | 8  | F  | vomiting, enlarged abdomen              | hepatopathy                | liver cirrhosis        | 46.0 | 1.5x0.8x0.5                | normal      |
| 22 | JRT                  | 10 | M  | diarrhoea                               | GI disease                 | enteritis              | 54.0 | 0.3x0.3x0.3                | normal      |
| 23 | JRT                  | 2  | F  | trembling, pain                         | hepatitis                  | liver degeneration     | 54.5 | 0.5x0.3x0.3                | normal      |
| 24 | Yorkshire<br>Terrier | 9  | M  | bloody diarrhoea                        | intestinal<br>tumour       | intestinal carcinoma   | 58.1 | 1.8x1.0x0.4                | normal      |

|    |                      |    |    |                                         |                                |                                       |       |                            |                  |
|----|----------------------|----|----|-----------------------------------------|--------------------------------|---------------------------------------|-------|----------------------------|------------------|
| 25 | Dachshund            | 13 | FN | diarrhoea, painful abdomen              | GI disease                     | GI disease,<br>liver degeneration     | 68.0  | 1.0x0.5x0.3                | + nod. hyp.      |
| 26 | Yorkshire<br>Terrier | 7  | FN | vomiting, diarrhoea,<br>painful abdomen | GI disease                     | liver degeneration                    | 68.1  | 0.8x0.4x0.3                | normal           |
| 27 | Maltese              | 8  | M  | vomiting, painful abdomen               | GI disease                     | leiomyoma, intestinal<br>invagination | 71.0  | 0.7x0.5x0.2<br>0.5x0.2x0.1 | normal           |
| 28 | Labrador             | 9  | F  | hemoperitoneum                          | ruptured ulcer<br>of intestine | intestinal ulcer                      | 71.4  | Complete<br>pancreas p.m.  | normal           |
| 29 | Rottweiler           | 7  | M  | vomiting, diarrhoea<br>weight loss      | GI disease                     | enteritis                             | 74.7  | 0.7x0.5x0.2                | normal           |
| 30 | CKCS                 | 3  | FN | vomiting, diarrhoea                     | GI disease                     | enteritis                             | 82.8  | 0.5x0.4x0.3<br>0.4x0.3x0.2 | normal           |
| 31 | German<br>Shepherd   | 7  | M  | severe jaundice,<br>weight loss         | liver disease                  | hepatitis, liver degeneration         | 89.9  | 0.6x0.6x0.3                | + nod. hyp.      |
| 32 | Terrier              | 6  | MN | apathy,<br>painful abdomen              | splenitis                      | splenic haemorrhage, trauma           | 93.5  | 0.5x0.3x0.3                | + focal bleeding |
| 33 | French<br>Bulldog    | 4  | F  | diarrhoea, ascites                      | liver and GI<br>disease        | liver degeneration                    | 97.5  | 0.6x0.3x0.2                | ++ nod. hyp.     |
| 34 | German               | 10 | FN | vomiting, diarrhoea                     | ileus                          | enteritis                             | 100.9 | 0.9x0.4x0.2                | + fibrosis,      |

|    |             |    |    |                                                   |                     |                                  |       |                            |                                                  |
|----|-------------|----|----|---------------------------------------------------|---------------------|----------------------------------|-------|----------------------------|--------------------------------------------------|
|    | Shepherd    |    |    |                                                   |                     |                                  |       |                            | ++ nod. hyp.                                     |
| 35 | Poodle      | 14 | MN | vomiting                                          | GI disease          | enteritis,<br>liver degeneration | 110.6 | 0.6x0.5x0.4                | + nod. hyp.                                      |
| 36 | Schapendoes | 10 | MN | elevated liver values                             | liver tumour        | liver degeneration               | 127.3 | 0.5x0.2x0.2                | normal                                           |
| 37 | Mix         | 11 | FN | vomiting, diarrhoea                               | GI disease          | enteritis,<br>liver degeneration | 159.3 | 1.0x1.0x1.0                | normal                                           |
| 38 | Elo         | 6  | FN | vomiting                                          | GI disease          | gastroenteritis, Helicobacter    | 183.9 | 0.3x0.2x0.2<br>1.0x0.6x0.4 | normal                                           |
| 39 | Mix         | 12 | MN | inappetence, weight loss,<br>enlarged lymph nodes | lymphoma            | intestinal lymphoma              | 297.4 | 1.0x0.5x0.5                | normal, ducts<br>with congestion<br>of secretion |
| 40 | JRT         | 8  | MN | painful abdomen                                   | abdominal<br>tumour | enteritis                        | >600  | 1.0x0.5x0.3                | normal                                           |

Abbreviations: +, mild; ++, moderate; +++, severe; CKCS, Cavalier King Charles Spaniel; F, female; FN, female neutered; GI, gastrointestinal; hyp.,

hyperplasia; JRT, Jack Russel Terrier; M, male; MN, male neutered; No., animal number; nod., nodular; cPLI, canine pancreatic lipase immunoreactivity; p.m.,

post mortem sample
