# Supplementary material for: Histopathological findings and canine pancreatic lipase immunoreactivity in normal dogs and dogs with inflammatory and neoplastic diseases of the pancreas
Source: PubMed Central journal article supplement — J Vet Intern Med. 2020 May 7;34(3):1127–34. doi: 10.1111/jvim.15779 (PMC7255677; doi:10.1111/jvim.15779), 2020-05-07
Supplement: JVIM-34-1127-s002.pdf [file JVIM-34-1127-s002.pdf]

**Supplementary Table 2:** Signalment, clinical findings, cPLI values in dogs with histopathologically diagnosed mild pancreatitis (group 2, n=8)

| No. | Breed      | Age | Sex | Clinical history                        | Tentative clinical diagnosis             | Final diagnosis                                                | cPLI (µg/L) | Sample size (cm)              | Histological diagnosis pancreas                               | Further histological diagnoses                                                                 |
|-----|------------|-----|-----|-----------------------------------------|------------------------------------------|----------------------------------------------------------------|-------------|-------------------------------|---------------------------------------------------------------|------------------------------------------------------------------------------------------------|
| 41  | JRT        | 12  | FN  | vomiting                                | liver-pancreas disease, ovarian tumour   | ++ hepatitis<br>ovarian cysts                                  | 111.6       | complete,<br>4 sites          | + acute pur. interlobular<br>pancreatitis                     | ++ mixed hepatitis<br>large serosa inclusion cysts                                             |
| 42  | Collie     | 10  | F   | enlarged abdomen                        | liver tumour                             | ++ liver cirrhosis                                             | 149.4       | 1.0x2.0x1.0                   | + acute mixed intralobular<br>pancreatitis                    | + acute pur. steatitis,<br>++ liver cirrhosis                                                  |
| 43  | Maltese    | 7   | M   | enlarged abdomen                        | peritonitis after multiple organ lesions | peritonitis after trauma                                       | 184.6       | 10 cm intestine with pancreas | + acute intralobular mixed<br>pancreatitis, ++ acinar deg.,   | +++ pur.-necr. steatitis with bacteria, ++ fibrinous serositis on liver and spleen             |
| 44  | Shih Tzu   | 3   | M   | diarrhoea, painful abdomen, weight loss | peritonitis                              | peritonitis after intestinal foreign body (splinter of wood)   | 316.7       | 1.0x0.3x0.2                   | + intralobular mixed pancreatitis,<br>+ acinar deg.           | +++ necr.-pur. steatitis                                                                       |
| 45  | Weimaraner | 11  | F   | vomiting, enlarged abdomen              | enteritis, infection                     | +++ liver deg.                                                 | 435.4       | 0.5x0.5x0.5                   | + chron. mixed intralobular<br>pancreatitis,<br>+ acinar deg. | +++ vacuolar hepatocytic degeneration                                                          |
| 46  | Mix        | 7   | MN  | diarrhoea                               | liver disease, enteritis                 | +++ vacuolar liver deg.,<br>+++ protein losing enteropathy and | 458.1       | 0.4x0.3x0.3                   | + perilobular edema<br>+ chron. pur. steatitis                | ++ lypc enteritis with +++ lymphangiectasia in villi,<br>+++ vacuolar hepatocytic degeneration |

|    |        |    |    |                              |                     |                                                        |      |                      |                                                                                          |                                                                                   |
|----|--------|----|----|------------------------------|---------------------|--------------------------------------------------------|------|----------------------|------------------------------------------------------------------------------------------|-----------------------------------------------------------------------------------|
|    |        |    |    |                              |                     | lypc. enteritis                                        |      |                      |                                                                                          |                                                                                   |
| 47 | Poodle | 9  | M  | vomiting,<br>painful abdomen | pancreatitis, ileus | liver abscess,<br>+++ lypc enteritis                   | >600 | 0.5x0.4x0.3          | + acute necr. pancreatitis                                                               | Focal abcess in liver,<br>+++ lypc enteritis with ++<br>villous atrophy           |
| 48 | WHWT   | 14 | FN | weight loss                  | liver tumour        | myeloid leukaemia<br>affecting liver and<br>lymph node | >600 | complete,<br>4 sites | + acute mixed interlobular<br>pancreatitis,<br>++ acinar deg.,<br>+ acute pur. steatitis | +++ diffuse infiltration of liver<br>and lymphnode with immature<br>myeloic cells |

Abbreviations: +, mild; ++, moderate; +++, severe; chron., chronic; deg., degeneration; F, female; FN, female neutered; JRT, Jack Russel Terrier; M, male; MN, male neutered;

necr., necrotising; No., animal number; cPLI, canine pancreatic lipase immunoreactivity; pur., purulent; WHWT, West Highland White Terrier
