# Supplementary material for: Histopathological findings and canine pancreatic lipase immunoreactivity in normal dogs and dogs with inflammatory and neoplastic diseases of the pancreas
Source: PubMed Central journal article supplement — J Vet Intern Med. 2020 May 7;34(3):1127–34. doi: 10.1111/jvim.15779 (PMC7255677; doi:10.1111/jvim.15779), 2020-05-07
Supplement: JVIM-34-1127-s003.pdf [file JVIM-34-1127-s003.pdf]

**Supplementary Table 3:** Signalment, clinical findings, cPLI values in dogs with histopathologically diagnosed acute and chronic moderate / severe pancreatitis (group 3, n=12)

| No. | Breed    | Age | Sex | Clinical history                     | Tentative clinical diagnosis | Final diagnosis                        | cPLI (µg/L) | Sample size (cm)                                          | Histological diagnosis pancreas                                                    |
|-----|----------|-----|-----|--------------------------------------|------------------------------|----------------------------------------|-------------|-----------------------------------------------------------|------------------------------------------------------------------------------------|
| 49  | Labrador | 5   | MN  | vomiting, lethargy, collapse         | pancreatic tumour            | +++ acute pancreatitis                 | 107.8       | mass: 8.0x4.0x4.0, multinodular, firm                     | +++ acute interlobular to diffuse pur.-necr. pancreatitis and steatitis            |
| 50  | Mix      | 6   | MN  | vomiting, lethargy                   | pancreatitis                 | ++ acute-on-chronic mixed pancreatitis | 195.7       | two pieces 0.5x0.3x0.3, 0.9x0.4x0.3                       | ++ acute-on-chronic periductal and interlobular mixed pancreatitis                 |
| 51  | Maltese  | 10  | M   | vomiting, painful abdomen            | pancreatic tumour            | +++ acute-on-chronic pancreatitis      | 499.1       | complete, 6 sites, enlarged as a mass: 10.0x4.0x3.0, firm | +++ acute-on-chronic interlobular pur.-necr. pancreatitis, +++ acinar atrophy      |
| 52  | Labrador | 2   | F   | collapse, jaundice, enlarged abdomen | intoxication                 | +++ acute pancreatitis                 | >600        | 0.7x0.5x0.3                                               | +++ acute pur.-necr. steatitis, + acute interst. pur. pancreatitis, ++ acinar deg. |

|    |                  |    |    |                                              |                                                 |                                        |      |                                                                    |                                                                                                                       |
|----|------------------|----|----|----------------------------------------------|-------------------------------------------------|----------------------------------------|------|--------------------------------------------------------------------|-----------------------------------------------------------------------------------------------------------------------|
| 53 | Terrier          | 13 | FN | vomiting<br>painful abdomen                  | pancreatitis                                    | ++ acute pancreatitis                  | >600 | 1.0x0.5x0.3                                                        | ++ acute pur.-necr.<br>steatitis,<br>++ acute interlobular pur.<br>pancreatitis, multiple ++<br>bleeding and necroses |
| 54 | JRT              | 8  | M  | diarrhoea,<br>vomiting,<br>painful abdomen   | pancreatitis                                    | +++ acute-on-chronic<br>pancreatitis   | >600 | complete, 7 sites, firm                                            | +++ acute-on-chronic<br>interlobular pur.-necr.<br>pancreatitis and steatitis                                         |
| 55 | Magyar<br>Vizsla | 10 | FN | vomiting,<br>inappetence,<br>painful abdomen | tumour or abscess<br>in pancreas or<br>duodenum | +++ acute-on-chronic<br>pancreatitis   | >600 | complete, 6 sites,<br>enlarged, multinodular                       | +++ acute-on-chronic<br>inter- and intralobular<br>pur.-necr. pancreatitis and<br>steatitis                           |
| 56 | JRT              | 13 | FN | painful abdomen                              | hepatitis                                       | ++ acute pancreatitis<br>and hepatitis | >600 | two pieces 2.5x0.7x0.7,<br>0.8x0.5x0.5                             | ++ acute pur.-necr.<br>steatitis,<br>+ intralobular mixed<br>pancreatitis,<br>++ acinar deg.                          |
| 57 | Labrador         | 11 | MN | painful abdomen                              | tumour                                          | +++ acute-on-chronic<br>pancreatitis   | >600 | complete, 8 sites,<br>enlarged, multiple<br>masses: 6.0x3.0x1.5 to | +++ acute-on-chronic<br>pur.-necr. interlobular<br>pancreatitis and steatitis                                         |

|    |                                 |   |    |                                                    |                            |                                                   |       |                                               |                                                                                   |
|----|---------------------------------|---|----|----------------------------------------------------|----------------------------|---------------------------------------------------|-------|-----------------------------------------------|-----------------------------------------------------------------------------------|
|    |                                 |   |    |                                                    |                            |                                                   |       | 9.0x8.0x4.0                                   |                                                                                   |
| 58 | Labrador                        | 9 | MN | vomiting,<br>diarrhoea                             | pancreatitis or<br>tumour, | +++ acute pancreatitis                            | >600  | five pieces 0.1-0.2                           | +++ acute pur.-necr.<br>pancreatitis                                              |
| 59 | Labrador                        | 3 | M  | vomiting,<br>enlarged<br>abdomen, ate<br>chocolate | intoxication               | +++ acute pancreatitis,<br>gastroenteritis        | >600  | complete, 10 sites,<br>enlarged, multinodular | +++ acute pur.-necr.<br>pancreatitis and steatitis                                |
| 60 | Russian<br>Tsvetnaya<br>Bolonka | 8 | MN | jaundice,<br>vomiting                              | pancreatitis or<br>tumour  | ++ chronic pancreatitis,<br>post-hepatic jaundice | 149.9 | 1.5x0.7x0.5                                   | ++ chronic intra- and<br>interlobular<br>mixed pancreatitis,<br>++ acinar atrophy |

Abbreviations: +, mild; ++, moderate; +++, severe; deg., degeneration; F, female; FN, female neutered; GIT, gastrointestinal tract; JRT, Jack Russel Terrier; M, male; MN, male neutered; necr., necrotising; No., animal number; nod., nodular; cPLI, canine pancreatic lipase immunoreactivity; pur., purulent
