# Supplementary material for: Histopathological findings and canine pancreatic lipase immunoreactivity in normal dogs and dogs with inflammatory and neoplastic diseases of the pancreas
Source: PubMed Central journal article supplement — J Vet Intern Med. 2020 May 7;34(3):1127–34. doi: 10.1111/jvim.15779 (PMC7255677; doi:10.1111/jvim.15779), 2020-05-07
Supplement: JVIM-34-1127-s004.pdf [file JVIM-34-1127-s004.pdf]

**Supplementary Table 4:** Signalment, clinical findings, cPLI values in dogs with neoplasm within the pancreas (group 4, n=12)

| No. | Breed                  | Age | Sex | Clinical history                       | Tentative clinical diagnosis    | Tumour diagnosis                                                         | cPLI (µg/L) | Sample size (cm)                                                    | Histological diagnosis exocrine pancreas                                     |
|-----|------------------------|-----|-----|----------------------------------------|---------------------------------|--------------------------------------------------------------------------|-------------|---------------------------------------------------------------------|------------------------------------------------------------------------------|
| 61  | WHWT                   | 11  | FN  | diarrhoea,<br>vomiting,<br>weight loss | peritonitis                     | pancreatic adenoma,<br>moderate fibrinopurulent<br>peritonitis           | 166.0       | 1.4x0.5x0.3                                                         | + chronic non-pur.<br>pancreatitis                                           |
| 62  | Labrador               | 14  | F   | vomiting,<br>inappetence               | tumour                          | ductal pancreatic CA,<br>severe chronic pancreatitis,<br>liver cirrhosis | 19.2        | complete, 8 sites,<br>two masses:<br>3.0x1.0x1.0 and<br>3.0x3.0x3.0 | +++ chron. interlobular non-<br>purulent pancreatitis, +++<br>acinar atrophy |
| 63  | Poodle                 | 9   | F   | vomiting, weight<br>loss               | abdominal<br>tumour             | ductal pancreatic CA                                                     | 131.4       | complete, 8 sites                                                   | normal,<br>+ interlobular fibrosis                                           |
| 64  | Australian<br>Shepherd | 6   | F   | jaundice, lethargy                     | tumour                          | acinar pancreatic CA                                                     | 235.2       | complete, two<br>masses:<br>9.0x8.0x8.0 and<br>6.0x6.0x5.0          | + mixed pancreatitis, ++<br>fibrosis                                         |
| 65  | Small<br>Münsterländer | 10  | MN  | inappetence,<br>vomiting, jaundice     | Sonography:<br>mass in pancreas | acinar pancreatic CA                                                     | 373.1       | complete, 10 sites,<br>multinodular                                 | +++ focal necrosis<br>(thrombus),<br>+ chron. intralobular non-              |

|    |                       |    |    |                                               |                                 |                                         |       |                                                                         |                                                                     |
|----|-----------------------|----|----|-----------------------------------------------|---------------------------------|-----------------------------------------|-------|-------------------------------------------------------------------------|---------------------------------------------------------------------|
|    |                       |    |    |                                               |                                 |                                         |       |                                                                         | pur. pancreatitis                                                   |
| 66 | Flat-Coated Retriever | 5  | F  | anaemia                                       | abdominal tumour                | acinar pancreatic CA                    | 383.6 | complete, 8 sites<br>mass: 7.0x4.0x4.0                                  | ++ focal chron. mixed pancreatitis,<br>+++ focal necrosis in tumour |
| 67 | Yorkshire Terrier     | 13 | F  | tachycardia,<br>painful abdomen               | pancreatitis<br>versus tumour   | acinar pancreatic CA                    | 431.7 | 0.7x0.6x0.2                                                             | normal                                                              |
| 68 | Mix                   | 11 | M  | vomiting,<br>diarrhoea, weight loss, jaundice | liver disease,<br>tumour        | acinar pancreatic CA                    | 490.5 | complete,<br>8 sites,<br>multinodular,<br>multiple masses<br>0.1 to 0.2 | ++ acute-on-chronic pur. pancreatitis                               |
| 69 | Briard                | 12 | MN | haematuria                                    | abdominal tumour                | metastases from CA of<br>unknown origin | 42.5  | complete,<br>8 sites,<br>multinodular,<br>mass: 8.0x4.0x4.0             | + interlobular pur. pancreatitis                                    |
| 70 | German Shepherd       | 9  | MN | vomiting,<br>inappetence                      | abdominal tumour                | metastases of gastric CA                | 110.1 | complete,<br>8 sites                                                    | normal                                                              |
| 71 | Collie                | 10 | F  | vomiting,<br>weight loss                      | tumour with<br>liver metastases | gastric cancer                          | 374.8 | complete, 6 sites,<br>enlarged, firm                                    | + chron. interlobular and<br>periductal non-pur.                    |

|    |                     |    |    |                    |              |                                    |      |                                         |                                           |
|----|---------------------|----|----|--------------------|--------------|------------------------------------|------|-----------------------------------------|-------------------------------------------|
|    |                     |    |    |                    |              |                                    |      |                                         | pancreatitis,<br>+ acinar deg.            |
| 72 | Golden<br>Retriever | 11 | FN | vomiting, jaundice | liver tumour | metastases of<br>hepatocellular CA | >600 | complete,<br>8 sites, enlarged,<br>firm | ++ multifocal acute necr.<br>pancreatitis |

Abbreviations: +, mild; ++, moderate; +++, severe; CA, carcinoma; chron., chronic; deg., degeneration; F, female; FN, female neutered; M, male; MN, male neutered; necr., necrotising; No., animal number; nod., nodular; cPLI, canine pancreatic lipase immunoreactivity; pur., purulent; WHWT, West Highland White Terrier
